# Supplementary material for: α-Mangostin Promotes In Vitro and In Vivo Degradation of Androgen Receptor and AR-V7 Splice Variant in Prostate Cancer Cells
Source: MDPI journal article supplement (doi:10.3390/cancers15072118), 2023-04-01
Supplement: s1 [file s1]

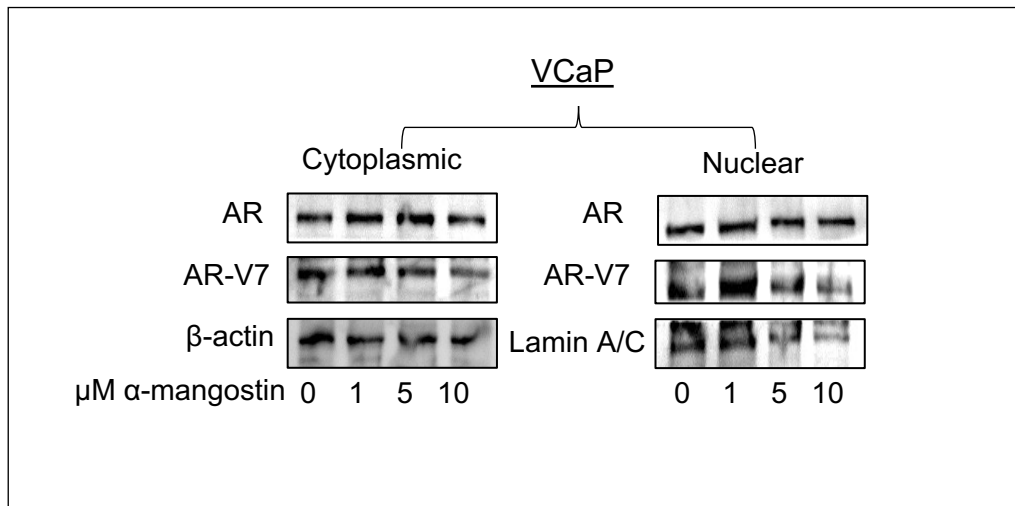

Figure S1. Nuclear translocation of AR and AR-V7 in VCaP cells. Nuclear and cytoplasmic fractions from cells treated with  $\alpha$ -mangostin for 24 hours were analyzed for androgen receptor expression by Western blot.
