# Supplementary material for: α-Mangostin Promotes In Vitro and In Vivo Degradation of Androgen Receptor and AR-V7 Splice Variant in Prostate Cancer Cells
Source: MDPI journal article supplement (doi:10.3390/cancers15072118), 2023-04-01
Supplement: s1 [file s1]

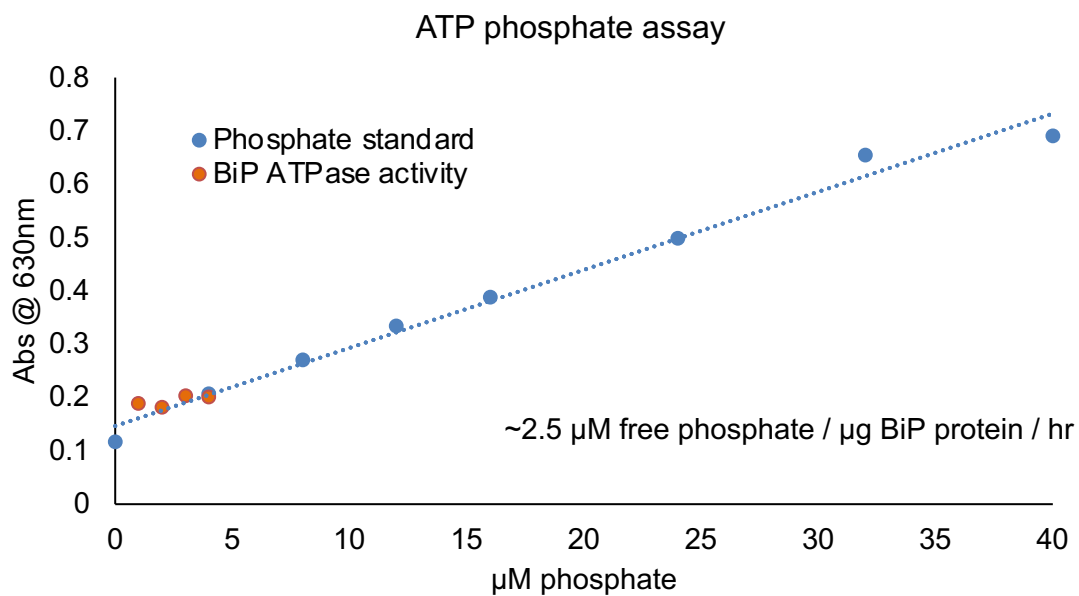

Figure S2. ATPase activity of recombinant His-GST-BiP protein.  
The ATPase activity of purified BiP-GST protein was monitored using a Malachite Green Phosphate assay.
