# Supplementary material for: α-Mangostin Promotes In Vitro and In Vivo Degradation of Androgen Receptor and AR-V7 Splice Variant in Prostate Cancer Cells
Source: MDPI journal article supplement (doi:10.3390/cancers15072118), 2023-04-01
Supplement: s1 [file s1]

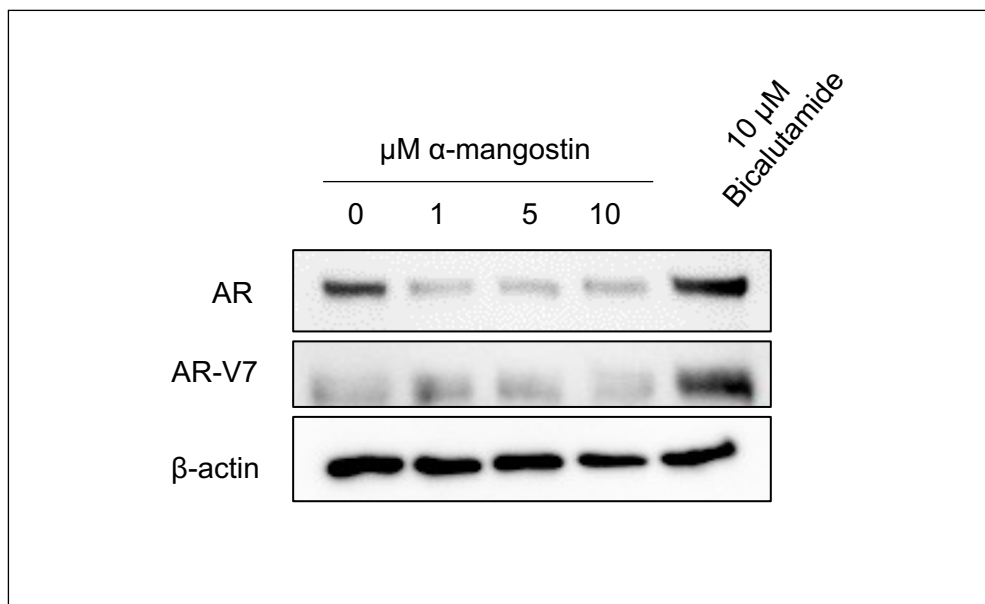

Figure S3. Bicalutamide does not decrease AR or AR-V7 expression *in vitro*. In 22Rv1 cells, bicalutamide did not decrease the expressions of AR or AR-V7 whereas  $\alpha$ -mangostin did.
